# Supplementary material
Source: publisher figshare collection journal article supplement (https://acs.figshare.com/ndownloader/files/3989443)
Supplement: Supplementary file 1 [file 3989443]

## **Supporting Information**

### **Atomic-Scale Processes at Fluorite/Water Interface Visualized by Frequency Modulation Atomic Force Microscopy**

Naritaka Kobayashi<sup>1,2</sup>, Shiro Itakura<sup>1</sup>, Hitoshi Asakawa<sup>3</sup> and Takeshi Fukuma<sup>1-4,\*</sup>

<sup>1</sup>Division of Electrical Engineering and Computer Science, Kanazawa University, Kakuma-machi, Kanazawa 920-1192, Japan

<sup>2</sup>Japan Society for the Promotion of Science, Ichiban-cho, Chiyoda, Tokyo 102-8472, Japan

<sup>3</sup>Bio-AFM Frontier Research Center, Kanazawa University, Kakuma-machi, Kanazawa 920-1192, Japan

<sup>4</sup>ACT-C, Japan Science and Technology Agency, Honcho 4-1-9, Kawaguchi 332-0012, Japan

\*Corresponding author, e-mail: [fukuma@staff.kanazawa-u.ac.jp](mailto:fukuma@staff.kanazawa-u.ac.jp)

## Supporting Figures

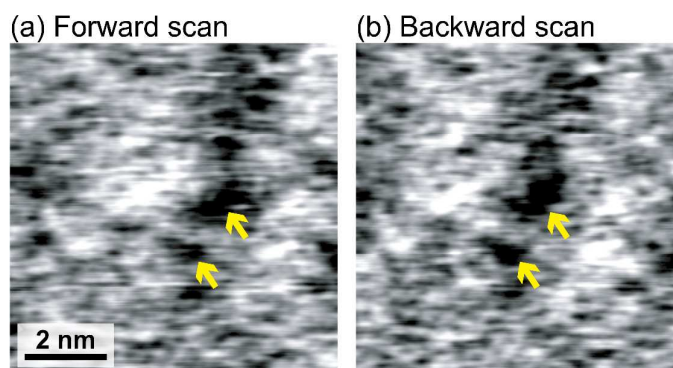

**Figure S1:** (a) Forward and (b) backward scan FM-AFM images of the atomically-disordered structures obtained in acidified saturated solution. The both images show similar atomic-scale contrasts as indicated by the arrows. The results suggest that the tip scan does not significantly disturb the atomic-scale surface structures.

## Supplementary Video Files

Following video files consist of successive FM-AFM images of fluorite(111) surface obtained in each solution condition.

- Water.avi: Pure water (pH = 6.5, 500 nm × 500 nm).
- AcidifiedWater.avi: Acidified water (pH = 2, 1  $\mu\text{m}$  × 1  $\mu\text{m}$ ).
- Saturated.avi: Saturated solution (pH = 6, 500 nm × 500 nm).
- AcidifiedSaturated.avi: Acidified saturated solution (pH = 2, 500 nm × 500 nm).
- Supersaturated10.avi: Supersaturated solution with  $\sigma = 10$  (pH = 6, 500 nm × 500 nm).
- Supersaturated100.avi: Supersaturated solution with  $\sigma = 100$  (pH = 6, 500 nm × 500 nm).

Note that  $\sigma$  denotes the degree of supersaturation. The time indicated in each frame corresponds to the time passed since the scan start. The time required for making the tip approach after the deposition of the imaging solution on the cleaved surface is typically 10 min.
